# Supplementary material
Source: PubMed Central journal article supplement (PMC5167181)
Supplement: pnas.1612394113.sapp.pdf [file pnas.1612394113.sapp.pdf]

## Supplemental Dataset:

### Mechanism of the Intrinsic Arginine Finger in Heterotrimeric G-Proteins

Daniel Mann, Christian Teuber, Stefan Tennigkeit, Grit Schröter, Klaus Gerwert, and Carsten Kötting

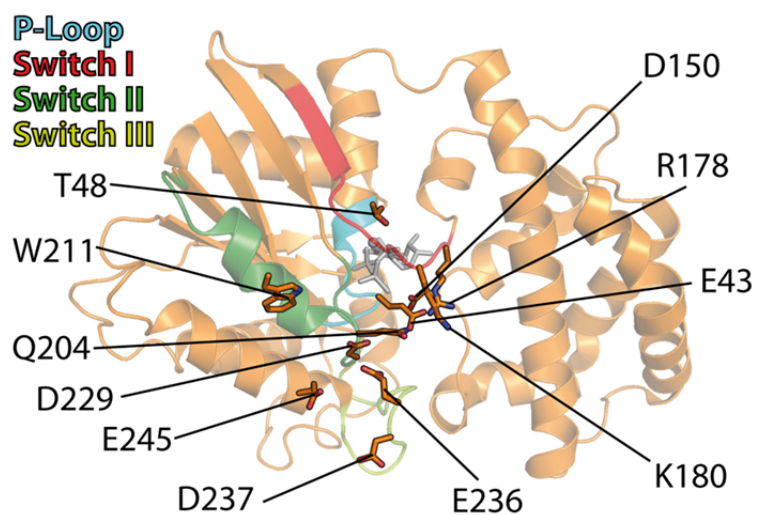

**Supplemental Figure 1: Locations of the investigated point mutants in G $\alpha_{i1}$  (PDB-ID 1GIA)**

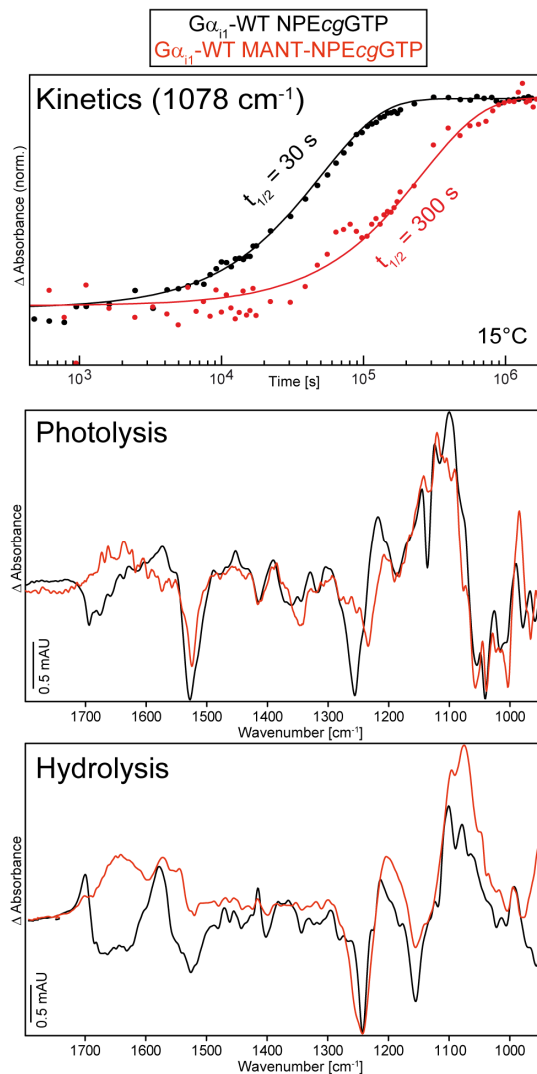

**Supplemental Figure 2: Exchange of GTP to MANT-GTP significantly alters kinetics and infrared spectra of Gα<sub>i1</sub>-WT**

Positive bands in the photolysis correspond to the GTP state, negative bands correspond to the caged-GTP state. Positive bands in the hydrolysis reaction represent the GDP state of Gα<sub>i1</sub> whereas negative bands represent the GTP state.

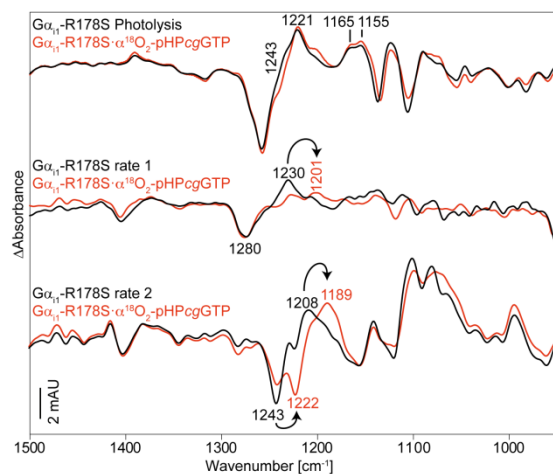

**Supplemental Figure 3: Assignment of IR bands of  $\alpha$ -GTP and  $\alpha$ -GDP in  $G\alpha_{i1}$ -R178S in  $H_2O$**

Positive bands in the photolysis correspond to the GTP state, negative bands correspond to the caged-GTP state. Positive bands in rate 1 and 2 of the hydrolysis reaction represent the GDP state of  $G\alpha_{i1}$ -R178S whereas negative bands represent the GTP state. Arrows indicate band shifts caused by the heavy isotopes.

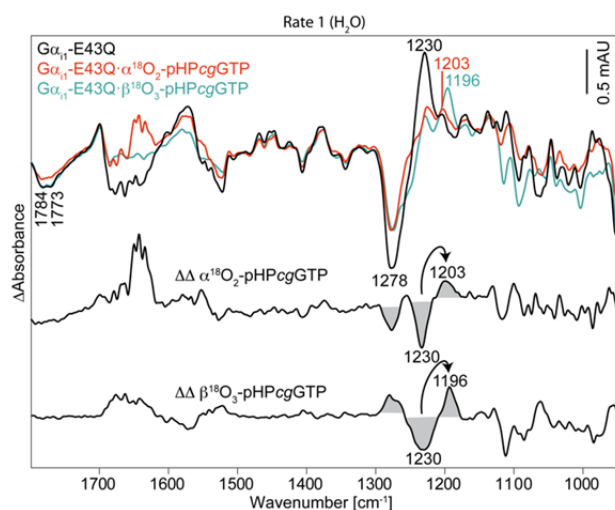

**Supplemental Figure 4:  $\alpha^{18}\text{O}_2$  pHPcgGTP and  $\beta^{18}\text{O}_3$  pHPcgGTP labeling of the rate that preceded hydrolysis in G $\alpha_{i1}$ -E43Q**

The mutant G $\alpha_{i1}$ -E43Q shows an additional rate that precedes the hydrolysis reaction. Isotopic labeling using  $\alpha^{18}\text{O}_2$  pHPcgGTP and  $\beta^{18}\text{O}_3$  pHPcgGTP showed that the band at 1230 cm<sup>-1</sup> is caused by  $\alpha$ - and  $\beta$ -GTP. Double differences ( $\Delta\Delta$ ) are the result of labeled minus unlabeled spectra. Arrows indicate band shifts caused by the heavy  $^{18}\text{O}$  isotopes.

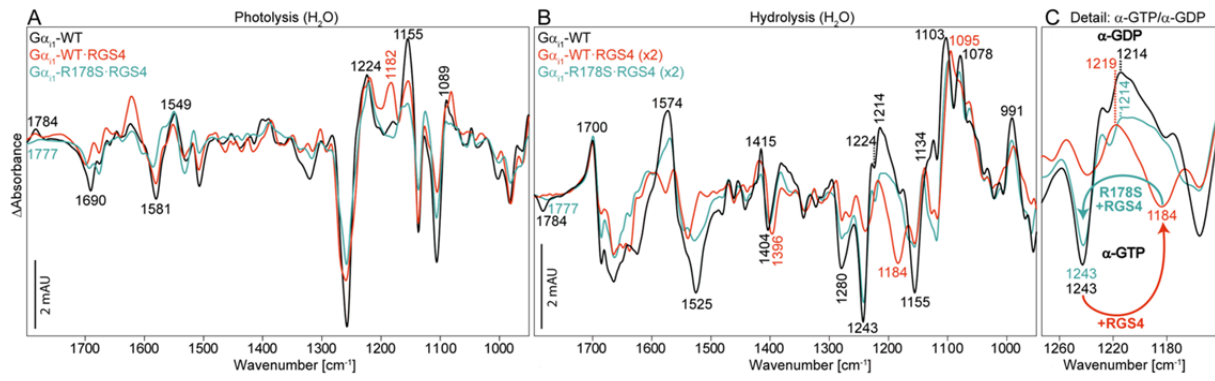

**Supplemental Figure 5: Photolysis (A) and Hydrolysis (B) spectra of intrinsic and RGS4 catalyzed  $G_{\alpha i1}$ -WT and the mutant  $G_{\alpha i1}$ -R178S. RGS4 addition shifts the  $\alpha$ -GTP vibration to lower wavenumbers. This effect is reversible when Arg178 is mutated (C).**

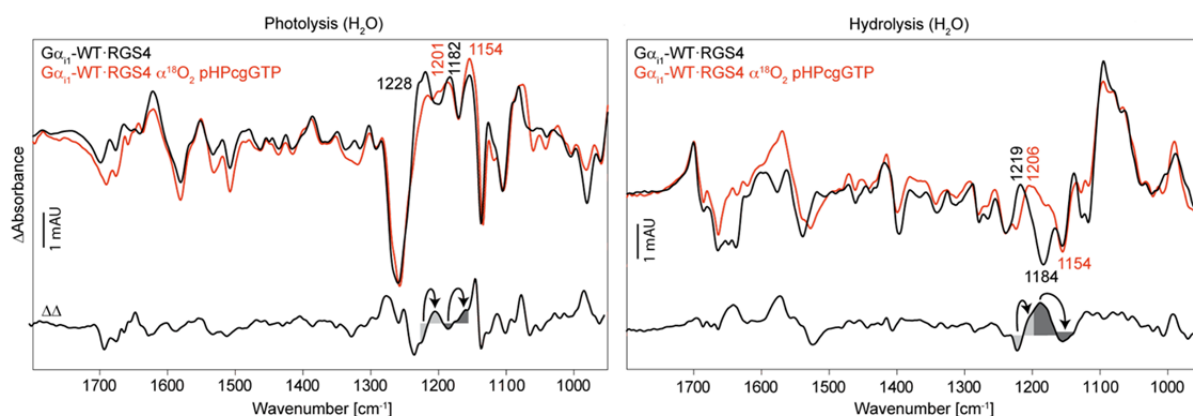

**Supplemental Figure 6:  $\alpha$ -GTP /  $\alpha$ -GDP band assignments of G $\alpha_{i1}$ ·RGS4 in H<sub>2</sub>O**

Positive bands in the photolysis correspond to the GTP state, negative bands correspond to the caged-GTP state. Positive bands in the hydrolysis reaction represent the GDP state of G $\alpha_{i1}$ ·RGS4 whereas negative bands represent the GTP state. Arrows indicate band shifts caused by the heavy isotopes.

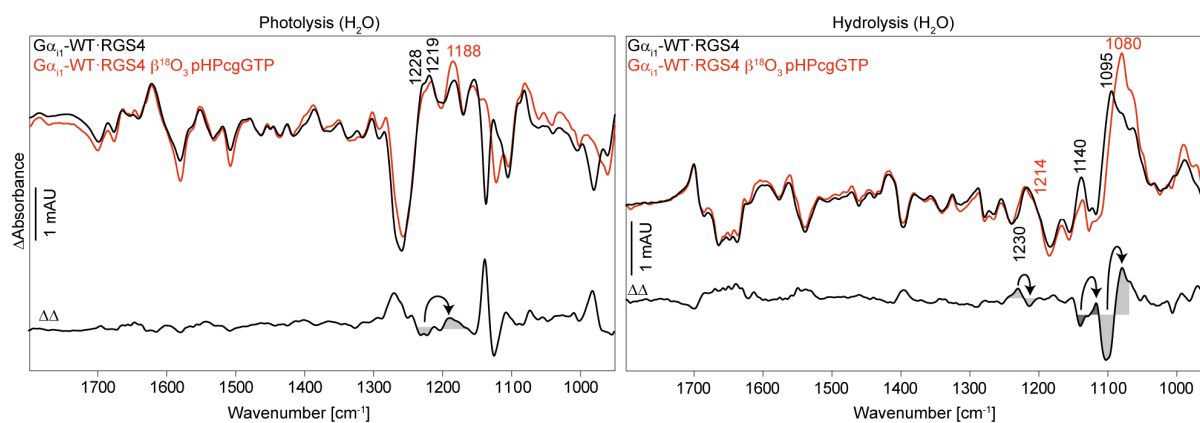

### Supplemental Figure 7: β-GTP / β-GDP band assignments of Gα<sub>i1</sub>·RGS4 in H<sub>2</sub>O

Positive bands in the photolysis correspond to the GTP state, negative bands correspond to the caged-GTP state. Positive bands in the hydrolysis reaction represent the GDP state of Gα<sub>i1</sub>·RGS4 whereas negative bands represent the GTP state. Arrows indicate band shifts caused by the heavy isotopes.

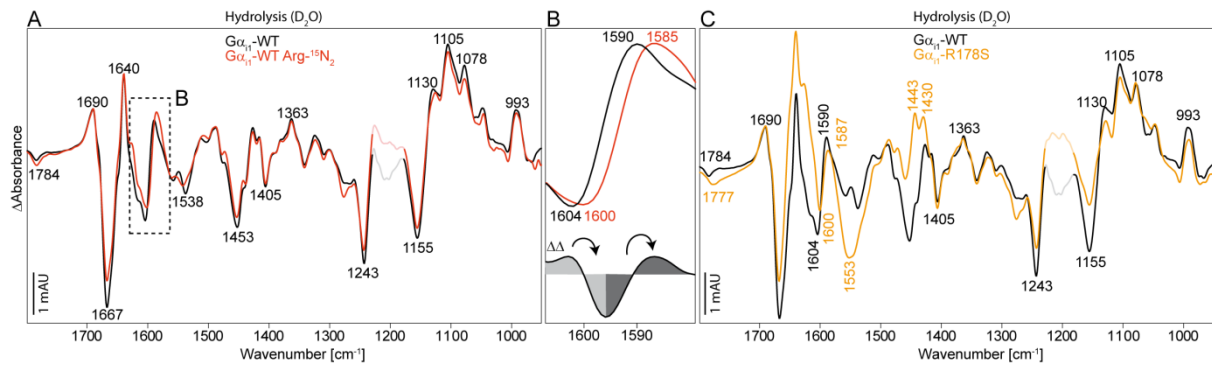

**Supplemental Figure 8: Infrared band assignment of  $G\alpha_{i1}$ -Arg178**

Deuterated hydrolysis spectra of unlabeled (black) and  $\eta^{15}N_2$ -Arg labeled  $G\alpha_{i1}$  (A). Detailed view (B) and double difference spectrum ( $\Delta\Delta$ ) of the assignment. The bands at 1604  $cm^{-1}$  (GTP state) and 1590  $cm^{-1}$  (GDP state) are assigned to Arg178. This assignment is site specific since the bands were also missing in the mutant  $G\alpha_{i1}$ -R178S (C). Positive bands correspond to the GDP state, negative bands correspond to the GTP state. Arrows indicate band shifts caused by the heavy isotopes. Grayed out areas are superimposed by DOD bending of deuterated water.



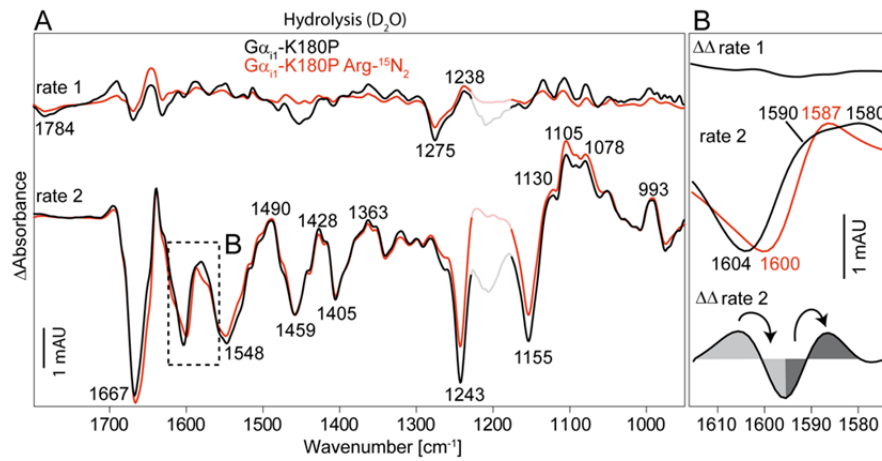

**Supplemental Figure 9: Infrared band assignment of  $G\alpha_{i1}$ -Arg178 in the rate separated mutant  $G\alpha_{i1}$ -K180P**

A: rate 1 and 2 of unlabeled (black) and  $\eta^{15}N_2$ -Arg labeled  $G\alpha_{i1}$ -K180P (red). B: double differences ( $\Delta\Delta$ ) of rate 1 show a zero-line, exclusively rate 2 shows isotopic shifts for the bands  $1604\text{ cm}^{-1}$  and  $1590\text{ cm}^{-1}$  like in wildtype  $G\alpha_{i1}$ . Positive bands correspond to the GDP state, negative bands correspond to the GTP state

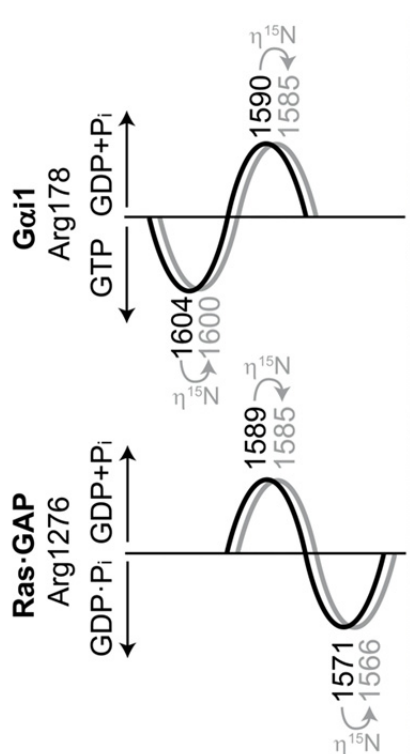

**Supplemental Figure 10: Infrared bands of the arginine finger in  $G\alpha_{i1}$  and Ras•GAP and their corresponding  $\eta^{15}\text{N}_2$  shifts (gray) in comparison.**

In  $G\alpha_{i1}$  1604  $\text{cm}^{-1}$  represents the GTP-bound state of the arginine finger whereas 1590  $\text{cm}^{-1}$  represents the GDP state. In Ras•GAP 1589  $\text{cm}^{-1}$  represents the arginine in a water environment whereas 1571  $\text{cm}^{-1}$  represents the arginine finger within the binding pocket but after bond beakage (17). The GTP bound state is not resolved in Ras•GAP and could now be resolved for the first time in  $G\alpha_{i1}$ .

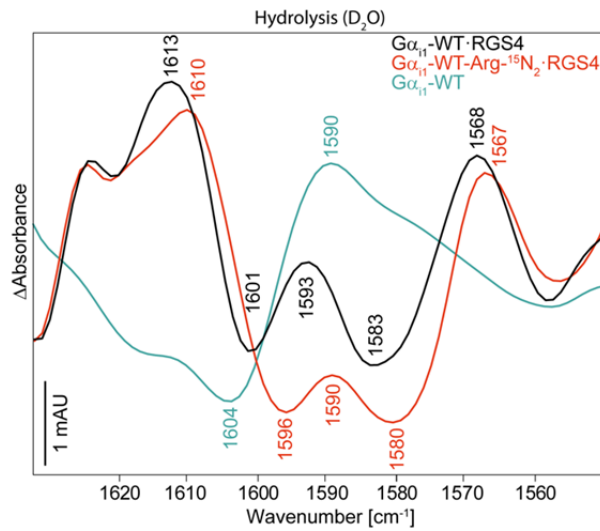

**Supplemental Figure 11: Isotopic labeling of the arginine finger in RGS4 catalyzed FTIR measurements of Gα<sub>i1</sub>.**

The intrinsic vibrations of Arg178 at 1604 and 1590 cm<sup>-1</sup> were no longer observable when RGS4 was added, probably due to altered GTP coordination. Positive bands represent the GDP state whereas negative bands represent the GTP state.

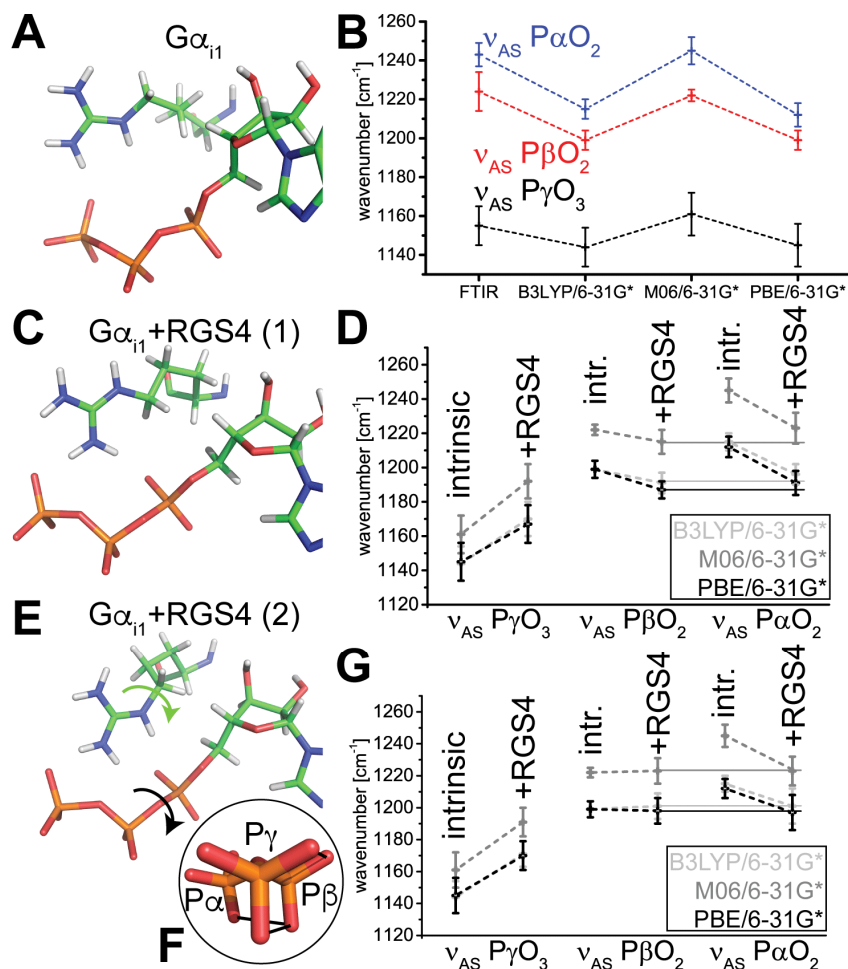

**Supplemental Figure 12: QM/MM calculations of  $G\alpha_{i1}$  and  $G\alpha_{i1}$ -RGS4.**

Intrinsic (A) and RGS4 catalyzed  $G\alpha_{i1}$  (C,E) and the corresponding calculated IR spectra from QM/MM simulations (B,D,G). QM/MM spectra calculation (B) of intrinsic  $G\alpha_{i1}$ -GTP (A) on the levels B3LYP/6-31G\*, M06/6-31G\* and PBE/6-31G\* in comparison to the experiment (FTIR). Shown are mean values and standard deviations for 15 snapshots of a 100 ns MD simulation. (D,G) Shown are RGS4 induced  $\alpha$ -,  $\beta$ - and  $\gamma$ -GTP shifts for configurations (C) and (E), respectively. Calculation of configuration (E) resulted in eclipsed ( $\alpha$ - $\beta$ - $\gamma$ )-GTP (F). While calculation of geometry (C) with RGS4 resulted in higher  $\alpha$ -GTP vibrations in comparison to the  $\beta$ -GTP vibrations (solid lines) this trend is reversed (G) for the eclipsed geometry (E) (solid lines) which is in line with the experiment. All spectra were scaled according to CCCBDB (B3LYP/6-31G\*: 0.96; M06/6-31G\*: 0.95; PBE/6-31G\*: 0.99).

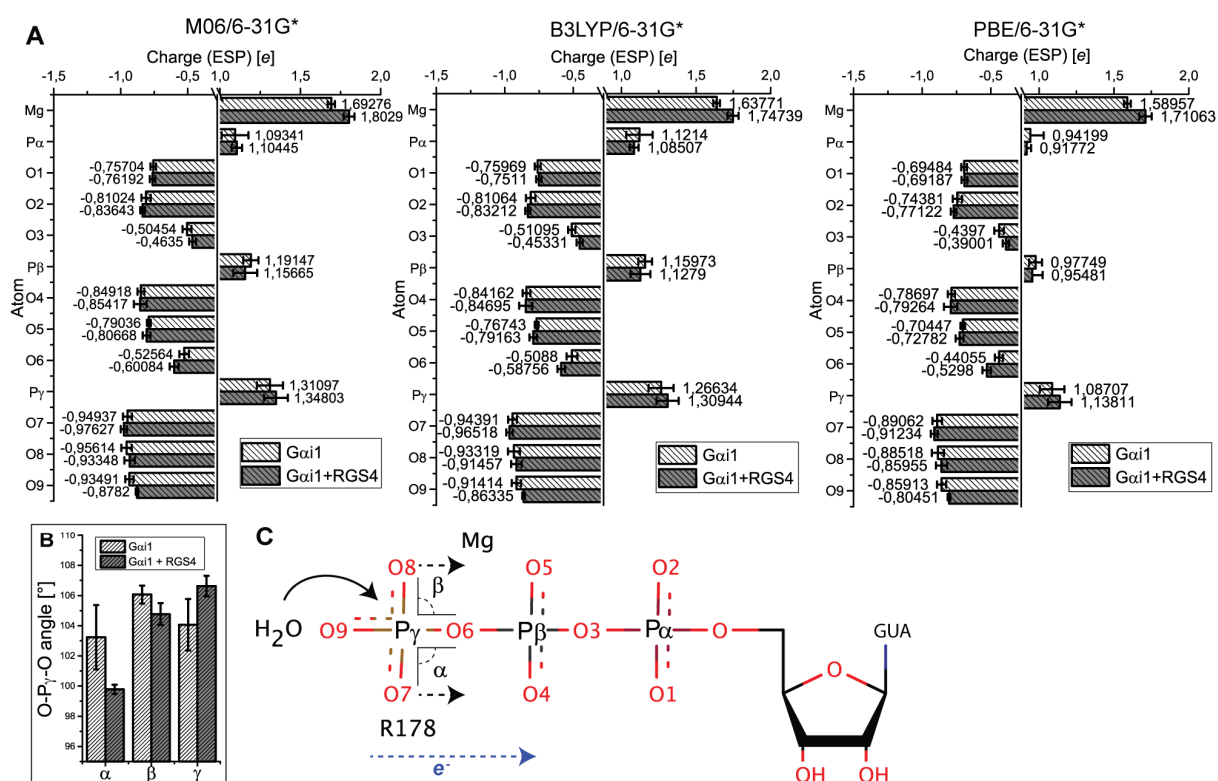

**Supplemental Figure 13: Detailed ESP Charge distribution of intrinsic and RGS4 bound  $G\alpha_{i1}$**

(A) ESP partial charges of intrinsic and RGS4 bound  $G\alpha_{i1}$  on the levels B3LYP/6-31G\*, M06/6-31G\* and PBE/6-31G\*. Charge is transferred towards the bridging  $\beta$ - $\gamma$ -GTP oxygen (O6). Atom names match those in panel (C). (B) planarity of  $\gamma$ -GTP is increased when RGS4 is bound.

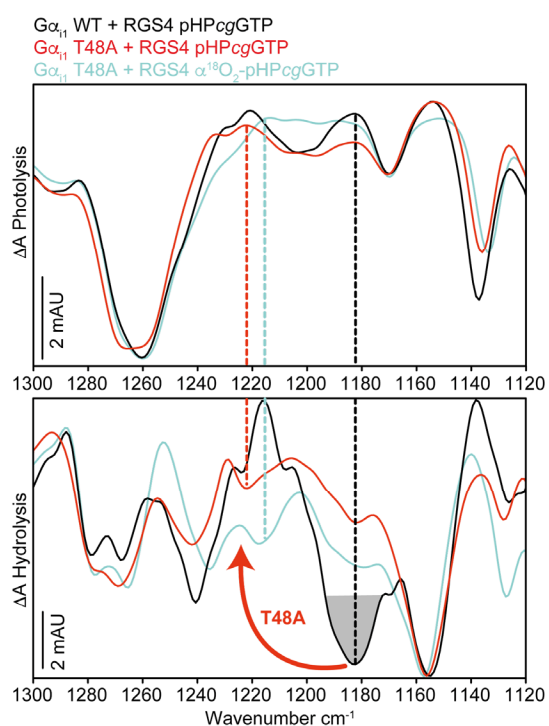

**Supplemental Figure 14: Band assignment of  $\alpha$ -GTP for the mutant  $G\alpha_{i1}$ -T48A+RGS4.**

In  $G\alpha_{i1}$ -T48A+RGS4 the  $\alpha$ -GTP band is shifted from 1184  $cm^{-1}$  to 1220  $cm^{-1}$ , indicating the RGS4 induced 59  $cm^{-1}$   $\alpha$ -GTP band shift is caused by strong binding of  $\alpha$ -GTP between Arg178 and Thr48.

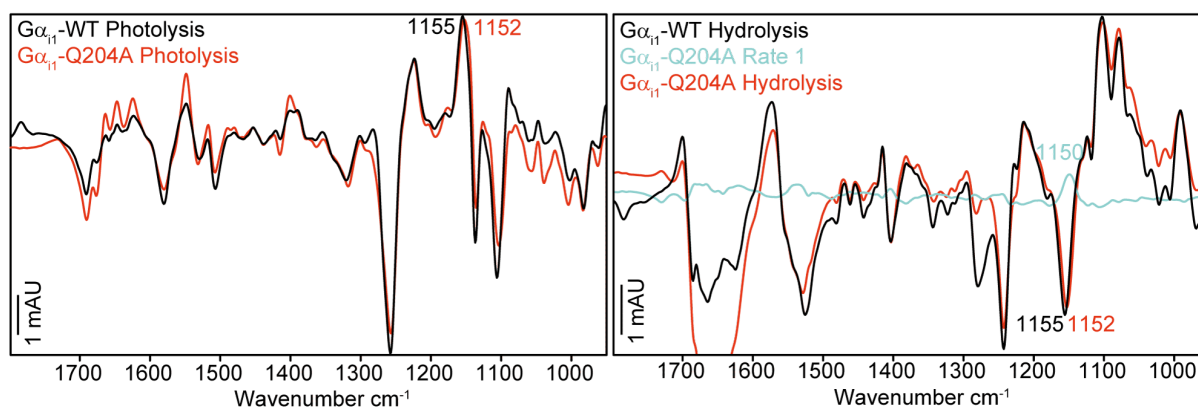

**Supplemental Figure 15: FTIR measurements of  $G\alpha_{i1}$ -WT and  $G\alpha_{i1}$ -Q204A**

Photolysis and hydrolysis spectra almost match completely. The  $\gamma$ -GTP band at  $1155\text{ cm}^{-1}$  is slightly red-shifted to  $1152\text{ cm}^{-1}$  and  $G\alpha_{i1}$ -Q204A shows an intermediate rate with a spectral feature at  $1150\text{ cm}^{-1}$ . Half-life values of global fits are depicted in Table 1.

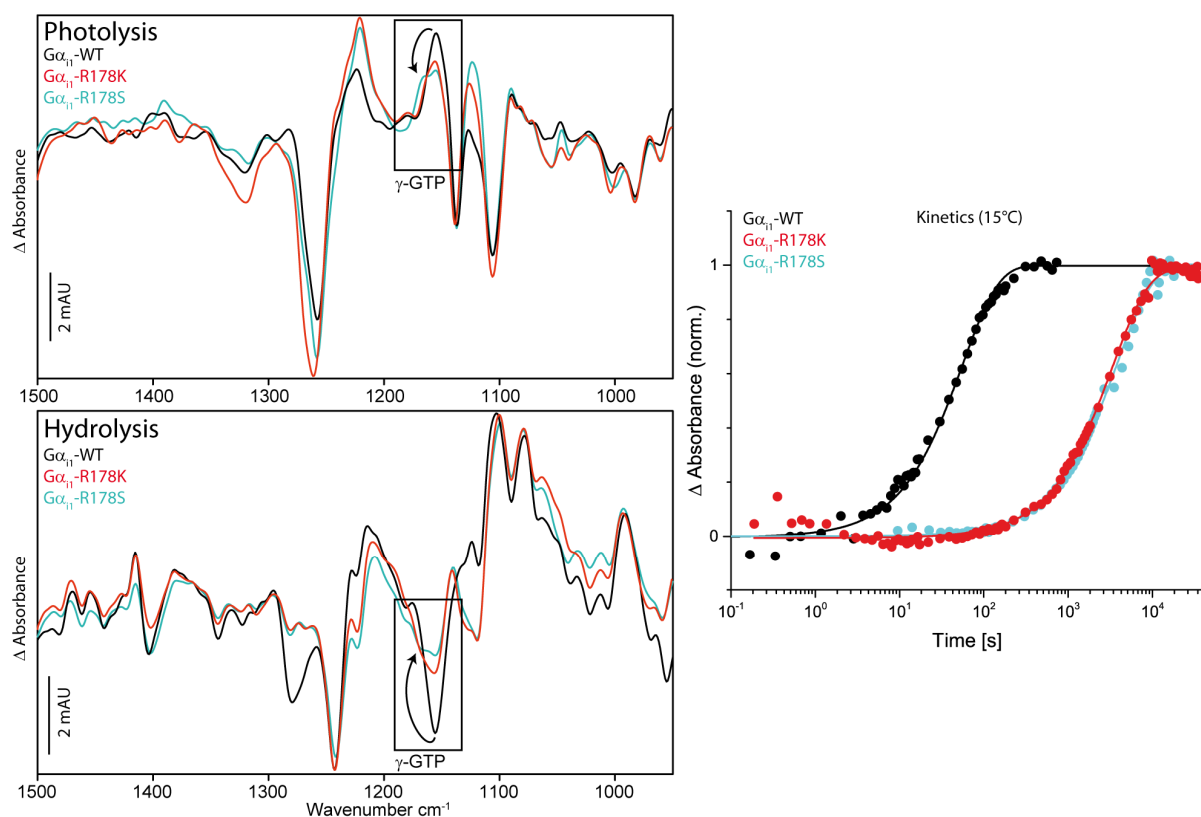

**Supplemental Figure 16: FTIR measurements of  $G\alpha_{i1}$ -R178K**

The  $\gamma$ -GTP vibration of  $G\alpha_{i1}$ -R178K resembles more the  $G\alpha_{i1}$ -WT  $\gamma$ -GTP vibration at 1155  $\text{cm}^{-1}$  than the  $\gamma$ -GTP vibration of  $G\alpha_{i1}$ -R178S, probably indicating that Lys178 is also bound to  $\gamma$ -GTP. However, hydrolysis kinetics are comparably slowed down, indicating not only the charge of the arginine finger is important but also its geometry.

|                      | $\Sigma P\gamma\text{-O}_3$ | $(P\gamma\text{-})\text{O}(-P\beta)$ | $\Sigma P\beta\text{-O}_2$ | $(P\beta\text{-})\text{O}(-P\alpha)$ | $\Sigma P\alpha\text{-O}_2$ |
|----------------------|-----------------------------|--------------------------------------|----------------------------|--------------------------------------|-----------------------------|
| $G\alpha_{i1}$       | -1.53                       | -0.52                                | -0.45                      | -0.50                                | -0.48                       |
| $G\alpha_{i1}$ +RGS4 | -1.45                       | -0.60                                | -0.50                      | -0.46                                | -0.50                       |

**Supplemental Table 1: Charge sums (ESP) in QM/MM calculations (M06/6-31G\*)**
